# Supplementary figures and images for: Rapid automated cell quantification on HIV microfluidic devices
Source: Royal Society of Chemistry journal article supplement (doi:10.1039/b911882a), 2009-01-01

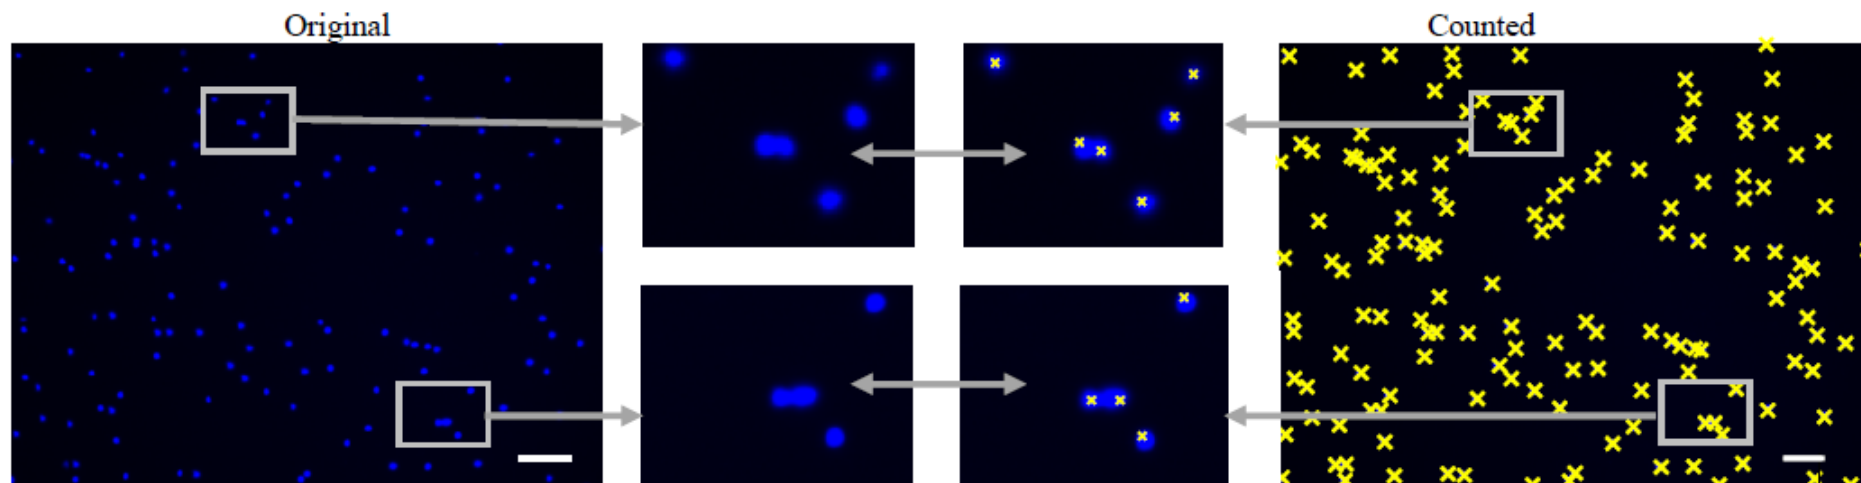

Supplement: figure_s2.pdf [file figure_s2.pdf]
